# Supplementary material for: Genetic divergences and hybridization within the Sebastes inermis complex
Source: PeerJ journal article supplement (doi:10.7717/peerj.16391), 2023-11-15

Morphotype    ● B    ● K    ● RW    n ● 50    ● 100  
 ● BW    ● R    ● W

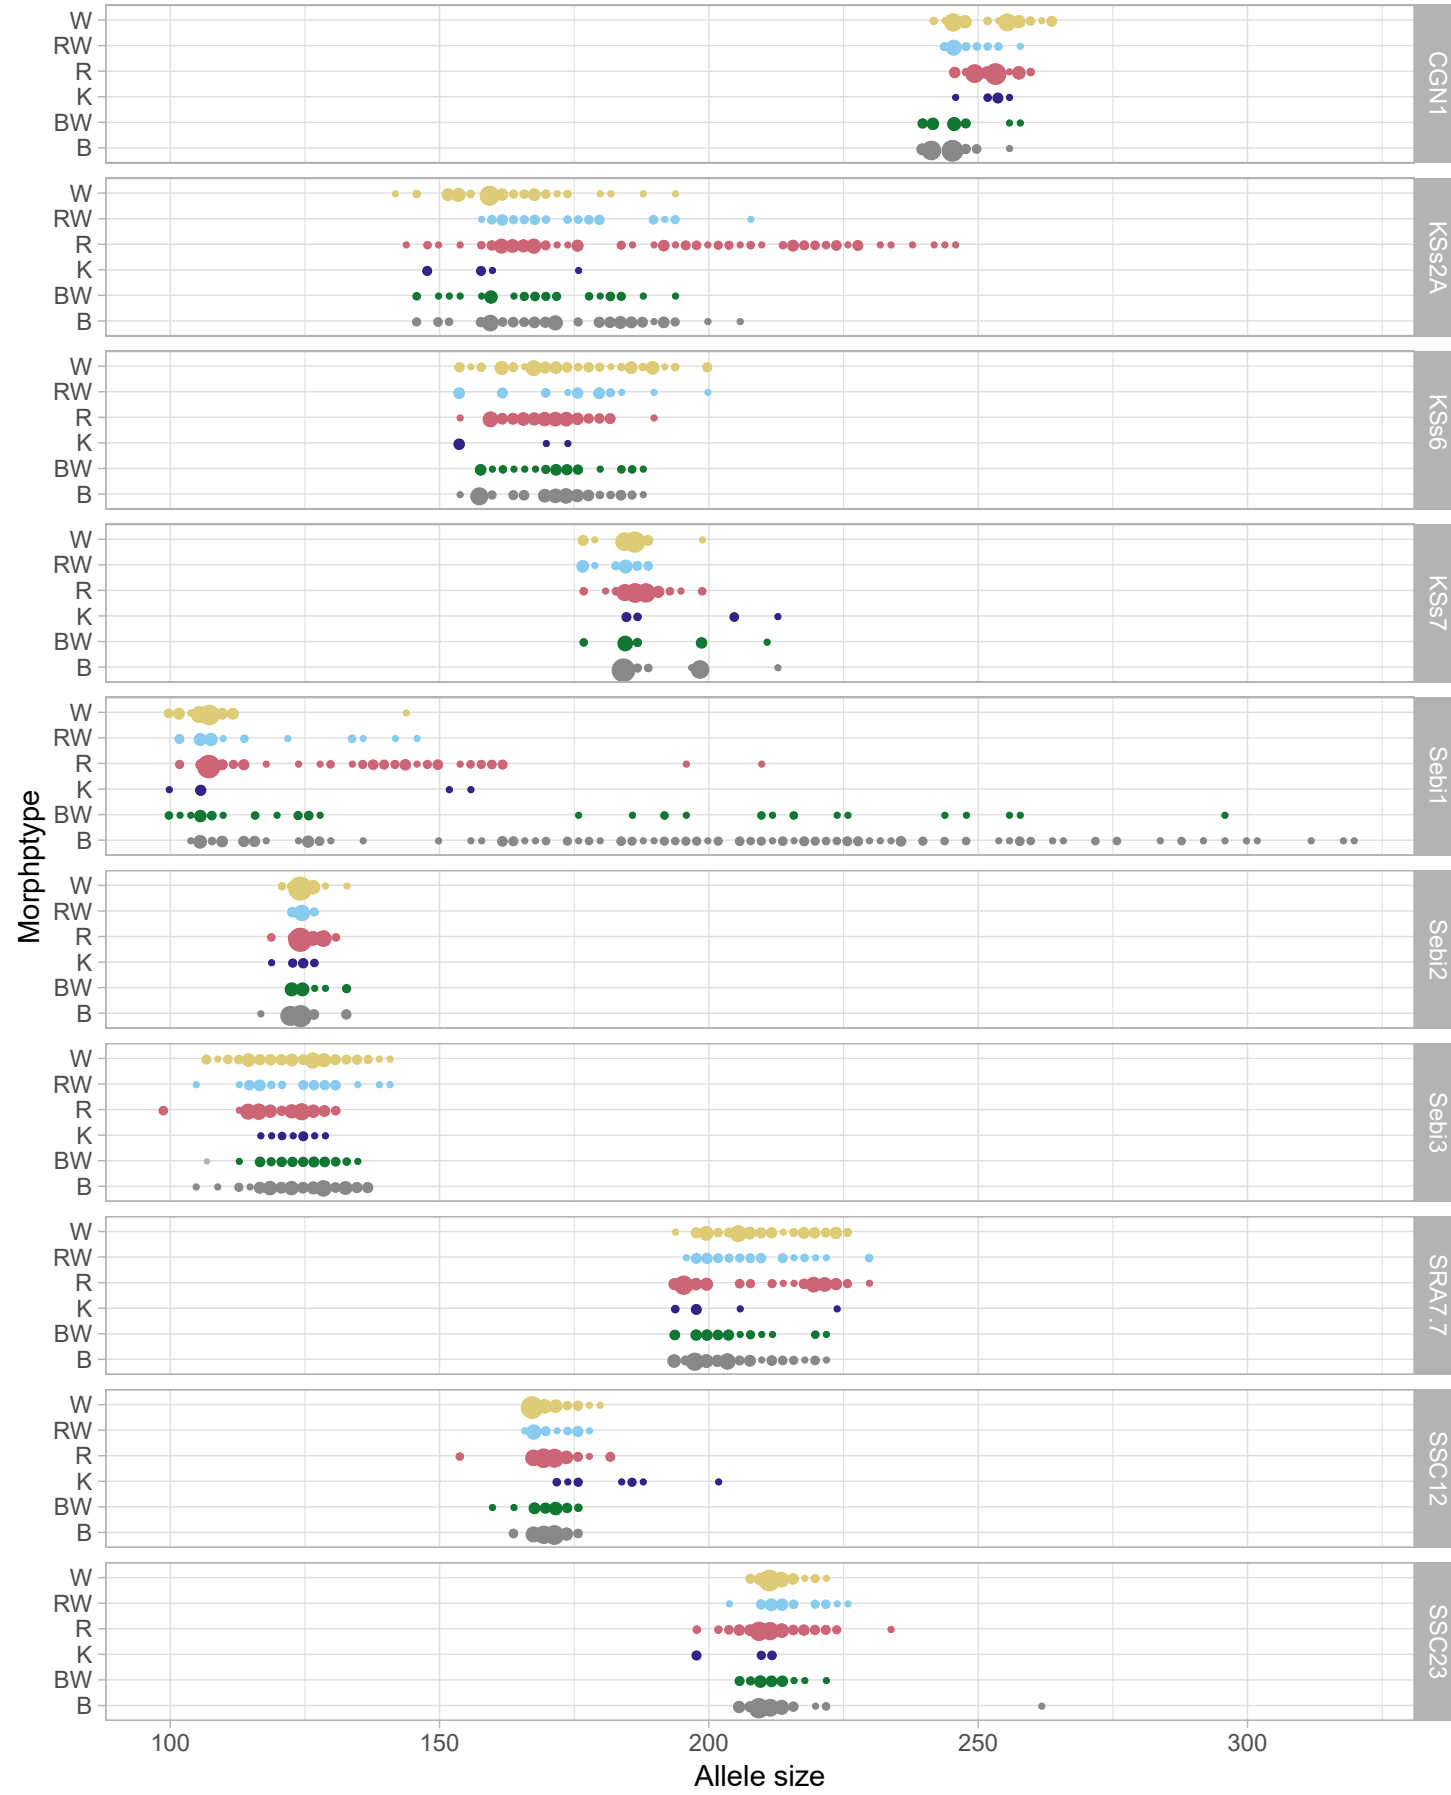

Supplement: FigS3.pdf [file FigS3.pdf]
