# Supplementary material for: Genetic divergences and hybridization within the Sebastes inermis complex
Source: PeerJ journal article supplement (doi:10.7717/peerj.16391), 2023-11-15

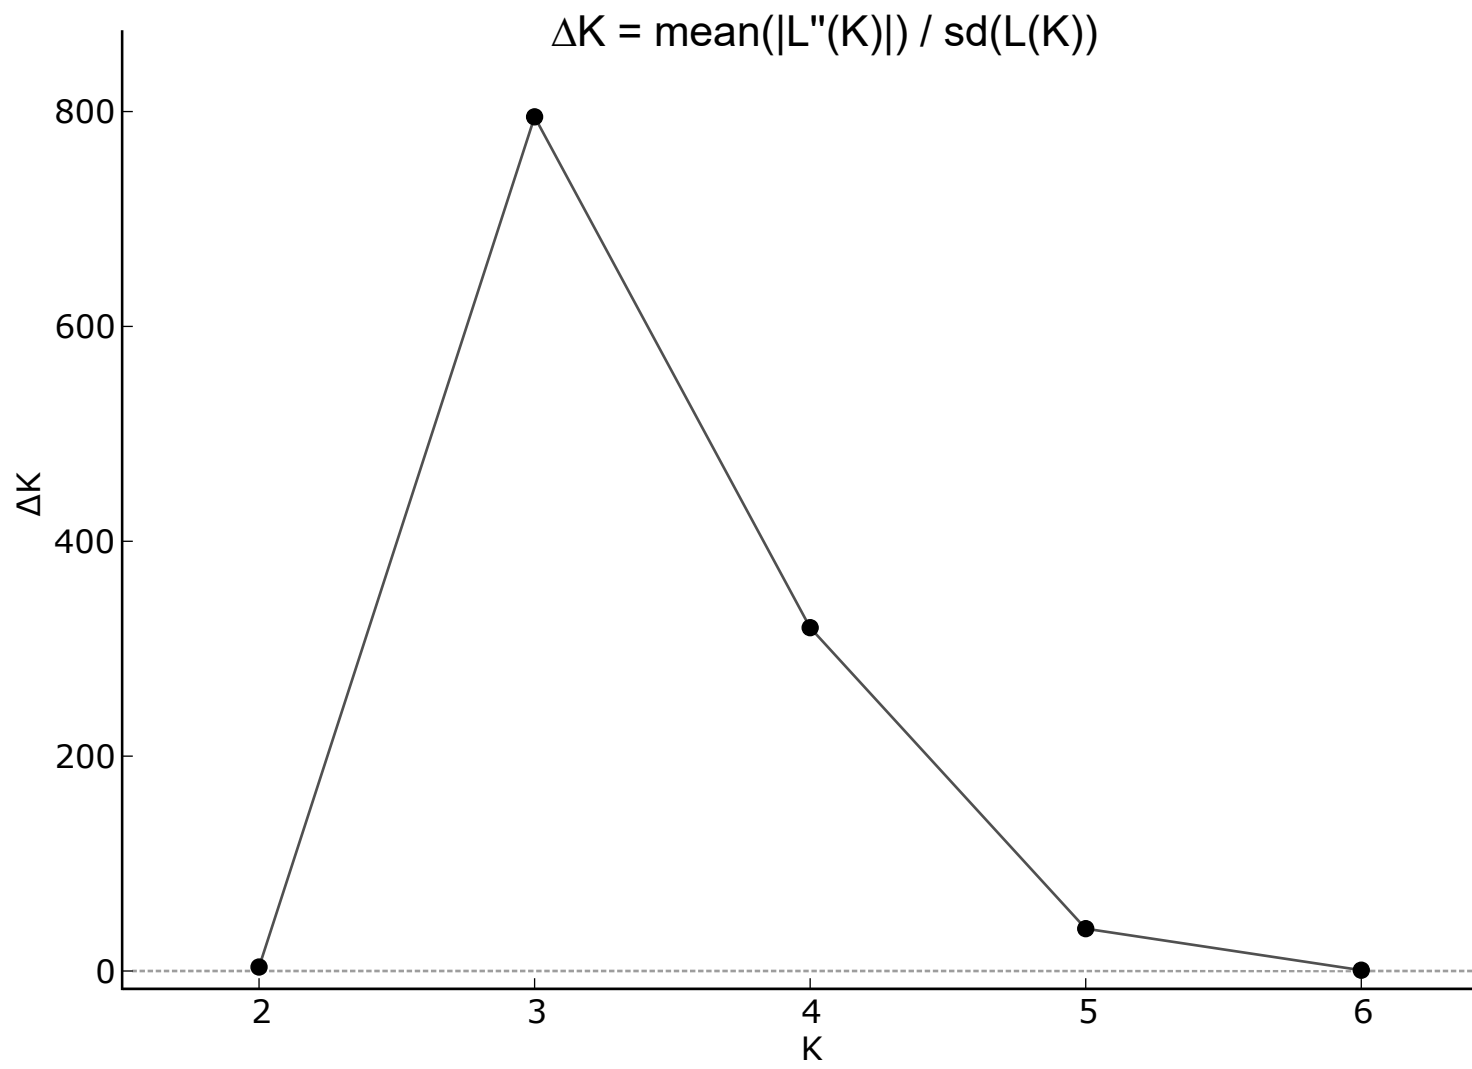

Supplement: FigS4.pdf [file FigS4.pdf]
